# Supplementary material for: Poly-cytosine-mediated nanotags for SERS detection of Hg2+
Source: Royal Society of Chemistry journal article supplement (doi:10.1039/c7nr05165d), 2017-01-01
Supplement: c7nr05165d1.pdf [file c7nr05165d1.pdf]

**Electronic Supplementary Material (ESI) for Nanoscale**  
**This journal is © The Royal Society of Chemistry 2017**

SUPPORTING INFORMATION

**Poly-Cytosine-Mediated Nanotags for SERS Detection of Hg<sup>2+</sup>**

Lin Qi,<sup>‡a</sup> Mingshu Xiao,<sup>‡a</sup> Fei Wang,<sup>b</sup> Lihua Wang,<sup>b</sup> Wei Ji,<sup>a</sup> Tiantian Man,<sup>a</sup> Ali Aldalbahi,<sup>c</sup> M. Naziruddin Khan,<sup>c</sup> Govindasami Periyasami,<sup>c</sup> Mostafizur Rahaman,<sup>c</sup> Abdulaziz Alrohaili,<sup>c</sup> Xiangmeng Qu,<sup>a</sup> Hao Pei,<sup>a</sup> Cheng Wang<sup>d</sup> and Li Li<sup>a\*</sup>

<sup>a</sup> Shanghai Key Laboratory of Green Chemistry and Chemical Processes, School of Chemistry and Molecular Engineering, East China Normal University, 500 Dongchuan Road, Shanghai, 200241, P. R. China.

<sup>b</sup> Address here. Division of Physical Biology & Bioimaging Center, Shanghai Synchrotron Radiation Facility, Shanghai Institute of Applied Physics, Chinese Academy of Sciences, Shanghai, 201800, P. R. China.

<sup>c</sup> Chemistry Department, King Saud University, Riyadh 11451, Saudi Arabia.

<sup>d</sup> Department of Nuclear Medicine, Renji Hospital, Shanghai Jiao Tong University School of Medicine, Shanghai 200127, P. R. China.

<sup>‡</sup>These authors contributed equally.

**Corresponding author:** \*E-mail: lli@chem.ecnu.edu.cn.

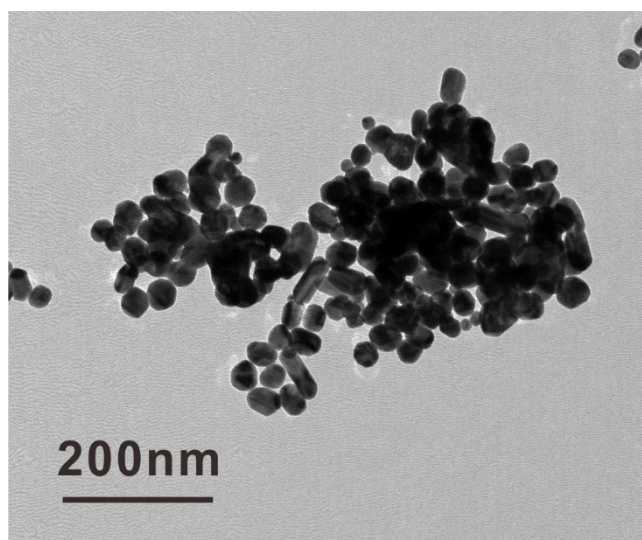

**Figure S1.** Representative TEM image of aggregation of SERS nanotags upon the addition  $10 \mu\text{M}$   $\text{Hg}^{2+}$ .

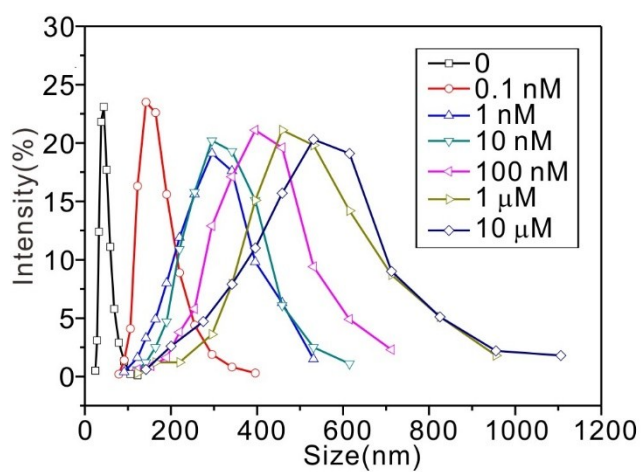

**Figure S2.** DLS analysis of SERS nanotags upon the addition of different concentrations of  $\text{Hg}^{2+}$ .

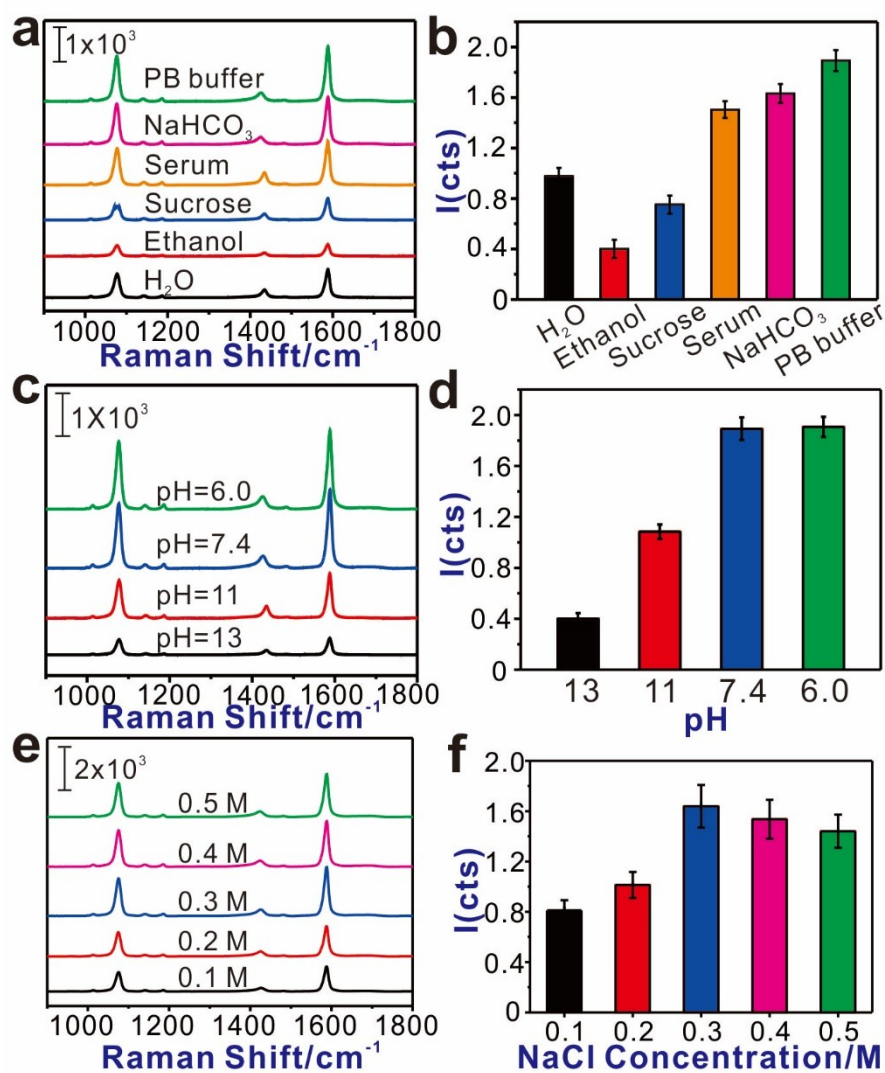

**Figure S3.** SERS spectra under different solvents (a), pH (c) and NaCl concentrations (e), and the intensity of peak at 1587 cm<sup>-1</sup> under different solvents (b), pH (d) and NaCl concentration (f).

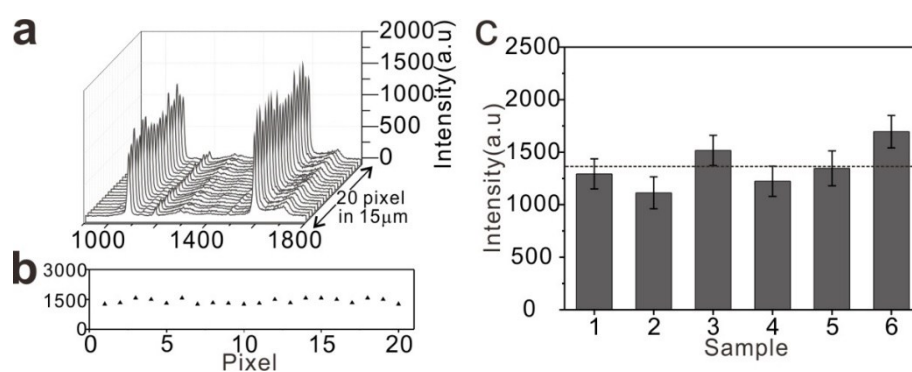

**Figure S4.** Reproducibility of the polyC<sub>40</sub>-mediated SERS nanotags in the presence of 1  $\mu\text{M}$  Hg<sup>2+</sup>. (a) Raman line scan in 15  $\mu\text{m}$  scanning distance with a 0.75  $\mu\text{m}$  step size. (b) Variation of SERS intensity at the specific Raman modes of 1587 $\text{cm}^{-1}$ . (c) Reproducibility of six parallel batches of the polyC<sub>40</sub>-mediated SERS nanotags in the presence of 1  $\mu\text{M}$  Hg<sup>2+</sup>. The measurement was carried out on randomly selected five spots per sample; error bars showing the standard deviation are included. The transverse dotted line indicates the average SERS intensity obtained from six samples.

**Table S1.** Sequences of the oligonucleotides.

| <b>Names</b>           | <b>Sequences (5'-3')</b>        |
|------------------------|---------------------------------|
| PolyC <sub>10</sub> -P | C <sub>10</sub> GATCACTGTCTGTTC |
| PolyC <sub>20</sub> -P | C <sub>20</sub> GATCACTGTCTGTTC |
| PolyC <sub>30</sub> -P | C <sub>30</sub> GATCACTGTCTGTTC |
| PolyC <sub>40</sub> -P | C <sub>40</sub> GATCACTGTCTGTTC |
| PolyC <sub>50</sub> -P | C <sub>50</sub> GATCACTGTCTGTTC |
| PolyC <sub>10</sub> -Q | C <sub>10</sub> CTGCAGTTCTGTCTG |
| PolyC <sub>20</sub> -Q | C <sub>20</sub> CTGCAGTTCTGTCTG |
| PolyC <sub>30</sub> -Q | C <sub>30</sub> CTGCAGTTCTGTCTG |
| PolyC <sub>40</sub> -Q | C <sub>40</sub> CTGCAGTTCTGTCTG |
| PolyC <sub>50</sub> -Q | C <sub>50</sub> CTGCAGTTCTGTCTG |
